# Supplementary material for: Probable impact of age and hypoxia on proliferation and microRNA expression profile of bone marrow-derived human mesenchymal stem cells
Source: PeerJ. 2016 Jan 14;4:e1536. doi: 10.7717/peerj.1536 (PMC4715434; doi:10.7717/peerj.1536)
Supplement: Supplemental Information 1 — Tables of raw data for Figure 1: MSCs characterization; (A) Immunophenotyping of BM-MSC from young and aged donors (n = 3). Representative graphs were all positive for CD105, CD90, CD44 and negative for CD19; (B) Cumulative population doubling (CPD) of MSC expanded under normal and hypoxic conditions at p15; (E) Representative reverse-transcription polymerase chain reaction run on 2% of agarose gel showing expression of aP2 and adiponectin by adipocytes and RUNX2 and osteopontin by osteocytes cells, induced from human bone-marrow mesenchymal stem cells. (F) Senescence-associated βGal activity in MSC of normal vs Hypoxic at p15. Figure 4: Reproducibility of NGS and comparison of miRNA expression between NGS and qPCR analysis. [file peerj-04-1536-s001.xlsx]

## Sheet: Fig 1A
	Supplementary Table 1: Raw data for Figure 1A: Immunophenotyping of MSC CD markers (%)											Means
		CD105	SD	CD90	SD	CD44	SD	CD19	SD			CD105	CD90	CD44	CD19
Young donors	27y	89.27	1.84	94.13	5.4	90.05	5.27	0.06	0.03		Young donors	87.8825	95.1933	94.2267	0.0766667
	19y	85.4375	2.11071	97.62	0.87	97.65	0.2	0.07	0.03		SD	2.12385	2.1069	3.8556	0.0208167
	21y	88.94	3.08	93.83	2.31	94.98	0.32	0.1	0.02		Old donors	77.8506	81.8133	81.3933	0.0433333
Old donors	80y	74.4533	1.93358	76.94	6	85.76	2.8	0.065	0.045		SD	2.99413	5.63249	4.22318	0.0292973
	70y	80.105	2.00201	80.52	4.26	81.09	1.9	0.055	0.02
	63y	78.9933	2.97793	87.98	7.02	77.33	3.99	0.01	0.01
* Means data was taken from a minimum of three biological replicates.Data are expressed as means ± standard deviations
Detailed description of CD markers.
CD marker	Full name, description
CD105	endoglin (aka MAb SH2)
CD90	cell surface protein Thy-1
CD19	B-lymphocyte surface antigen B4
CD44	cell surface glycoprotein
Patient characteristics of BM-MSCs from young and aged donors BM-MSCs
No. of	Age	Experimental grouping	Gender	Pathological type
samples
#1	19	Young (<30 y.o.)	M	Normal
#2	21	Young (<30 y.o.)	M	Normal
#3	27	Young (<30 y.o.)	F	Normal
#4	70	Aged (>60 y.o.)	M	Normal
#5	80	Aged (>60 y.o.)	M	Normal
#6	63	Aged (>60 y.o.)	F	Normal

## Sheet: Fig 1B
Supplementary Table 2: Raw data for Figure 1B: Cumulative population doubling (CPD) of MSC at p15
		Normal (nx)		Hypoxic (Hx)
		Mean of CPD at p15	SD	Mean of CPD at p15	SD						Young donors	Old donors	Young donors (Hx)	Aged donors (Hx)
Young donors	27y	24.6	2.37	35	0.88616					Means	25.9333	14.1467	34.1667	22.5667
	19y	27.1	1.98	36.3	1.46134					SD	1.25831	1.50816	2.65016	1.22202
	21y	26.1	5.13	31.2	1.28667
Old donors	80y	14.7	2.498	23.9	1.28667
	70y	15.3	3.94	22.3	2.64552
	63y	12.44	1.32	21.5	3.692
* Means data was taken from a minimum of three biological replicates.Data are expressed as means ± standard deviations

## Sheet: Fig 1E
	Table 1: Primers used in the differentiation of MSC
	Gene	Primer sequences	Product size (bp)
	aP2	F: TGGTTGATTTTCCATCCCAT	107 bp
		R: GCCAGGAATTTGACGAAGTC
	Adiponectin	F: ATGTCTCCCTTAGGACCAATAAG	234 bp
		R: TGTTGCTGGGAGCTGTTCTACTG
	RUNX2	F: TTCGTCAGCGTCCTATCAGTTC	149 bp
		R: CTTCCATCAGCGTCAACACC
	Osteopontin	F: TCGGAGGAGAAGGCGCATTACAGC	778 bp
		R: TCCTCATGGCTGTGAAACTCGTGG
	GAPDH	F: GGACACAATGGATTGCAAGG	284 bp
		R: TAACCACTGCTCCACTCTGG
	Figure 1E: Representative reverse-transcription polymerase chain reaction run on 2% of agarose gel showing expression of aP2 and adiponectin by adipocytes and RUNX2 and osteopontin by osteocytes cells, induced from human bone-marrow mesenchymal stem cells. Control cells without induction medium treatment did not show/less expression of above markers than differentiated cells.

## Sheet: Fig 1F
		Supplementary Table 3: Raw data for Figure 1E: Senescence marker (Beta-galactosidase) of MSC at p15
		Normal		Low oxygen
		<30 y.o. (normal)	>60 y.o. (normal)	<30 y.o. (low oxygen)	>60 y.o. (low oxygen)
		30	80	10	49
		19	60	8	40
		31	76	4	40
		27	64		43
			73		34
				Normal (nx)		Hypoxic (Hx)
				Mean	SD	Mean	SD			Young (normal)	Old (normal)	Young (Hypoxic)	Old (Hypoxic)
		Young donors	27y	28	3.54	10	2		Means	27.3333	71	7.33333	42.6667
			19y	23	2.72	8	2.52		SD	4.04145	6.245	3.05505	4.50925
			21y	31	0.98	4	2.08
		Old donors	80y	76	5.72	47	3.51
			70y	64	3.23	38	2
			63y	73	6.98	43	2.78
		* Means data was taken from a minimum of three biological replicates.Data are expressed as means ± standard deviations

## Sheet: Fig 4
Supplementary Table 4: Raw data for Figure 3:Validation of NGS miRNAs expression using qPCR analysis in MSC of young and old age donors.
		Young MSC
		RT-qPCR data Fold change (Log 2 transformed)					NGS data Fold change
	miRNAs	27y	19y	21y	Mean	SD	27y	19y	21y	Mean
	hsa-miR-21-5p	0.268	0.271	0.412	0.317	0.0822861	1.9888	2.2569	2.53598	2.26056
	hsa-miR-34b-3p	-0.3218	-0.4761	-0.2837	-0.360533	0.101881	-0.983	-1.489	-1.73	-1.40067
	hsa-miR-210	2.345	3.762	1.27	2.459	1.24991	14.223	13.695	12.986	13.6347
	hsa-miR-19b-3p	-0.618372	-0.2481	-0.786281	-0.550918	0.275358	-2.03877	-2.22466	-1.4932	-1.91888
	hsa-miR-33a-5p	0.25	-0.21	-0.42	-0.126667	0.342685	-3.92308	-4.30242	-4.2192	-4.14823
		Old MSC
		RT-qPCR data Fold change (Log 2 transformed)					NGS data Fold change
	miRNAs	80y	70y	63y	Mean	SD	80y	70y	63y	Mean
	hsa-miR-21-5p	-0.311	-0.218	-0.47	-0.333	0.127432	-3.224	-2.79	-1.834	-2.616
	hsa-miR-34b-3p	-0.412	-0.878	-0.671	-0.653667	0.233483	-3.01347	-4.10013	-5.90247	-4.33869
	hsa-miR-210	0.196	-0.298	-0.31537	-0.139123	0.290355	-0.501612	-0.62905	-0.893	-0.674554
	hsa-miR-19b-3p	-0.579307	-0.75392	-0.1011	-0.478109	0.337971	-1.5689	-2.961	-3.216	-2.58197
	hsa-miR-33a-5p	-0.219127	-2.7689	-3.513	-2.16701	1.72746	-5.9748	-3.98233	-4.54986	-4.83566
	* Means data was taken from a minimum of three biological replicates.Data are expressed as means ± standard deviations
	Figure 4: Reproducibility of NGS and comparison of miRNA expression between NGS and qPCR analysis. A) qPCR analysis in MSC of young and old age donors, B) Correlation plot comparing the Fold change values of qPCR with the log2 of the NGS in young donors, C) Correlation plot comparing the Fold change values of qPCR with the log2 of the NGS in old donors. Corresponding R2 values were determined by …
